# Supplementary material for: Characterization and anticancer bioactivity of the fungal immunomodulatory protein FIP-Gre from Ganoderma resinaceum
Source: Research Square preprint supplement (doi:10.21203/rs.3.rs-8423392/v1), 2026-01-06
Supplement: Supplementary file 1 [file 0490c49418c41faa5c6ce079.docx]

**Supplementary Data**

**Table 1: The Primer Sequences Used for Real Time PCR for Gene Expression Studies.**

| **Primers** | **Sequence** |
| --- | --- |
| BAX Forward | 5’-GGAGGATTGTGGCCTTCTTT-3’ |
| BAX Reverse | 5’-GCCGTACAGTTCCACAAAGG-3’ |
| BCL2 associated X Forward | 5’- ACCAAGAAGCTGAGCGAGTG-3’ |
| BCL2 associated X Reverse | 5’-AAGTAGAAAAGGGCGACAACC-3’ |
| p53 Forward | 5’-AAGGAAATTTGCGTGTGGAG-3’ |
| p53 Reverse | 5’-CCAGTGTGATGATGGTGAGG-3’ |
| Caspase 3 Forward | 5’-GAGGCCGACTTCTTGTATGC-3’ |
| Caspase 3 Reverse | 5’-AATTCTGTTGCCACCTTTCG-3’ |
| Caspase 9 forward | 5’-AGAAAATGGTGCTGGCTTTG-3’ |
| Caspase 9 Reverse | 5’-GCTGGTCCCATTGAAGATGT-3’ |
| GAPDH forward | Provided in the RevertAid First Strand cDNA Synthesis Kit (Cat no. #K1622) |
| GAPDH reverse | Provided in the RevertAid First Strand cDNA Synthesis Kit (Cat no. #K1622) |

###

**Table 3: The Structure Validation of Top Models Predicted By trRosetta, AlphaFold2 and I-TASSER by SAVES V6.1**

| Servers | ERRAT | RAMACHANDRAN plot RESULTS | | | | |
| --- | --- | --- | --- | --- | --- | --- |
| **Most favoured region, %** | **Allowed Region, %** | **Disallowed Region, %** | | |
| trRosetta | 90.2913 | | 78.1% | | 17.7% | 2% |
| AlphaFold2 | 93.2039 | | 95.8% | | 4.2% | 0% |
| I-TASSER | 89.3204 | | 88.5% | | 10.4% | 0% |

**Table 4: The ZDOCK Score of Docked Complexes.**

| Docked complex | Z dock score |
| --- | --- |
| LZ8-EGFR | 1089.822 |
| FIP-Gre-EGFR | 877.065 |
| LZ8-C-met | 1400.556 |
| FIP-Gre-C-met | 1524.366 |

**Table 5: The hemeagglutination assay of rFIP-Gre. A positive response took the notation (+); a negative reaction (−).**

| Red blood cells | PHA  2 | rFIP-Gre 0.25 | rFIP-Gre 0.5 | rFIP-Gre 1 | rFIP-Gre 2 | rFIP-Gre 4 | rFIP-Gre 8 | rFIP-Gre 16 | rFIP-Gre 32 | rFIP-Gre 64 | rFIP-Gre 128 |
| --- | --- | --- | --- | --- | --- | --- | --- | --- | --- | --- | --- |
| Mouse | ++ | − | − | − | − | + | + | + | + | + | + |
| Human | ++ | − | − | − | − | − | − | − | − | − | − |
| Sheep | ++ | − | − | − | − | − | − | − | − | − | − |

**Table 6: The hemeagglutination assay of rLZ8. A positive response took the notation (+); a negative reaction (−).**

| Red blood cells | PHA  2 | rLZ8 0.25 | rLZ8 0.5 | rLZ8 1 | rLZ8 2 | rLZ8 4 | rLZ8 8 | rLZ8 16 | rLZ8 32 | rLZ8 64 | rLZ8 128 |
| --- | --- | --- | --- | --- | --- | --- | --- | --- | --- | --- | --- |
| Mouse | ++ | − | − | − | − | − | + | + | + | + | + |
| Human | ++ | − | − | − | − | − | − | − | − | − | − |
| Sheep | ++ | − | − | − | − | − | − | − | − | − | − |

**Table 7: Anti-bacterial activity of FIP-LZ8 at different concentrations against 5 different bacterial strains.**

| Concentrations | *E. coli* | *Staphylococcus aureus* | *Pseudomonas aeruginosa* | *Klebsiella pneumoniae* | *Salmonella typhi* |
| --- | --- | --- | --- | --- | --- |
| 25 μg/ml (LZ8) | **0** | **0** | **0** | **0** | **0** |
| 50 μg/ml(LZ8) | **0** | **0** | **0** | **0** | **0** |
| 100 μg/ml(LZ8) | **0** | **0** | **0** | **0** | **0** |
| Nitrofurantoin 300μg | **25mm** | **20mm** | **-** | **-** | **-** |
| Colistin 10μg | **-** | **-** | **13mm** | **14mm** | **-** |
| Ceftriaxone 30μg | **-** | **-** | **-** | **-** | **25mm** |

**Table 8: Anti-bacterial activity of FIP-Gre at different concentrations against 5 different bacterial strains.**

| Concentrations | *E. coli* | *Staphylococcus aureus* | *Pseudomonas aeruginosa* | *Klebsiella pneumoniae* | *Salmonella typhi* |
| --- | --- | --- | --- | --- | --- |
| 25μg/ml (FIP-Gre) | **0** | **0** | **0** | **0** | **0** |
| 50μg/ml(FIP-Gre) | **0** | **0** | **0** | **0** | **0** |
| 100μg/ml(FIP-Gre) | **0** | **0** | **0** | **0** | **0** |
| Nitrofurantoin 300μg | **24mm** | **19mm** | **-** | **-** | **-** |
| Colistin 10μg | **-** | **-** | **12mm** | **13mm** | **-** |
| Ceftriaxone 30μg | **-** | **-** | **-** | **-** | **26mm** |

**Table 9: Quantification of RNA Extracted from Treated as well as The Control Group of Cells.**

| Sample | Concentration  of RNA(ng/µL) | A260/A280 |
| --- | --- | --- |
| Sample 1 (cells treated with 8µg/mL of LZ8) | **980** | 1.5 |
| Sample 2 (cells treated with 8 µg/mL FIP-Gre) | **990** | 1.5 |
| Sample 3 (control, cells treated with PBS) | 1014 | 1.6 |


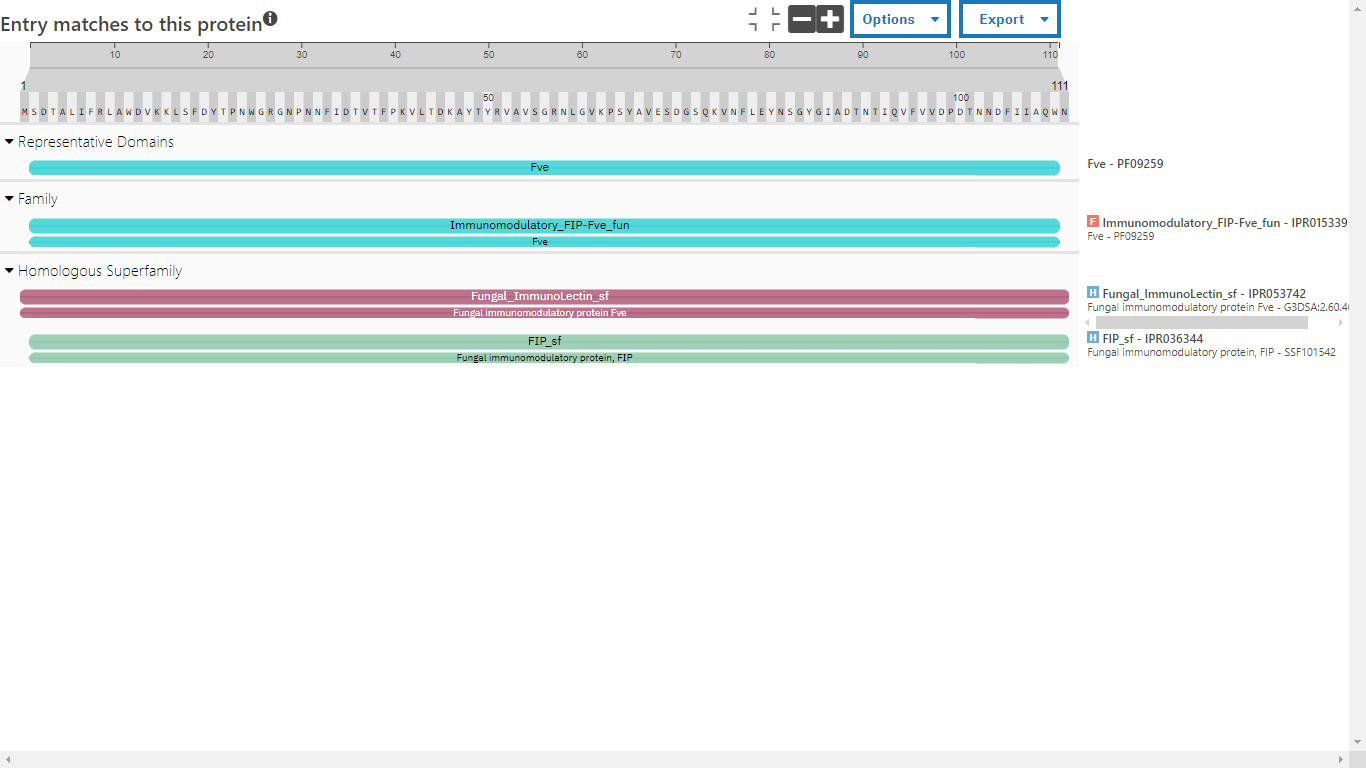


**Figure 1: Domain prediction of FIP-LZ8. The domain and family of FIP-Gre was predicted by InterPro and it was found to belong to domain Fve PF09259**

**
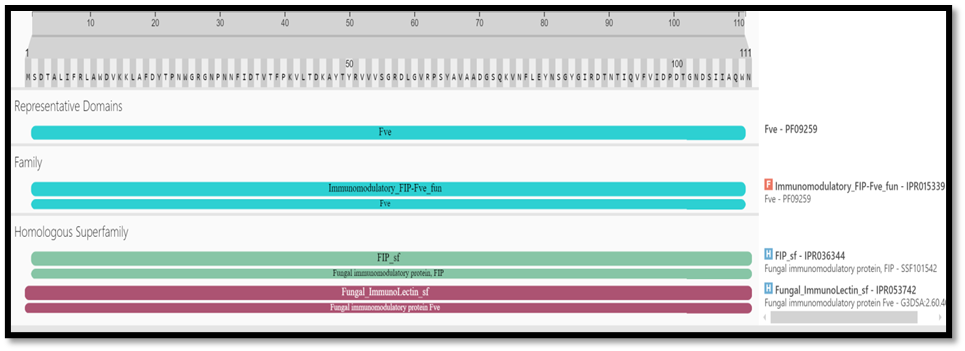
Figure 2: Domain prediction of FIP-Gre. The domain and family of FIP-Gre was predicted by InterPro and it was found to belong to domain Fve PF09259.**


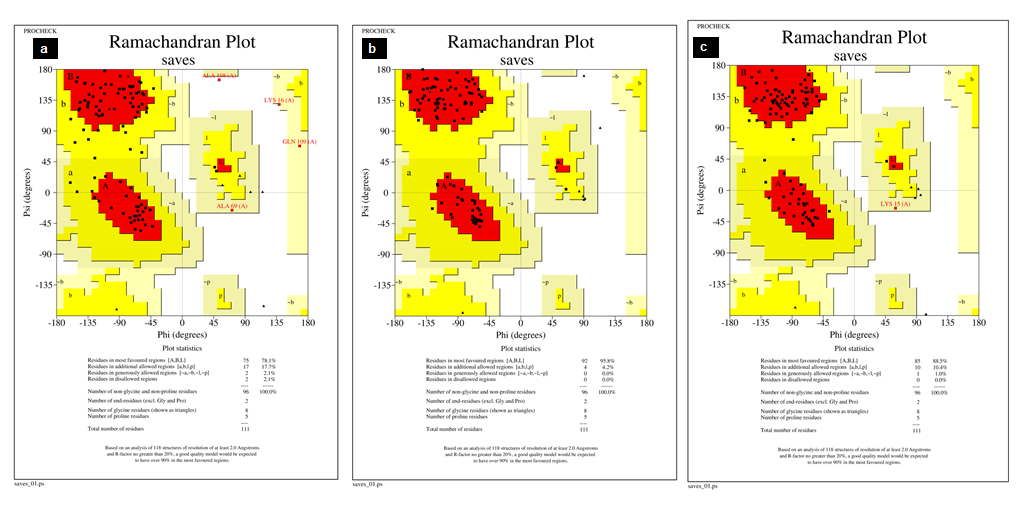


**Figure 3: The Ramachandran plot generated by PROCHECK (SAVESv 6.1). (a) Ramachandran plot of the predicted model by trRosetta (b) Ramachandran plot of the predicted model by AlfaFold2. (c) Ramachandran plot of the predicted model by I-TASSER.**


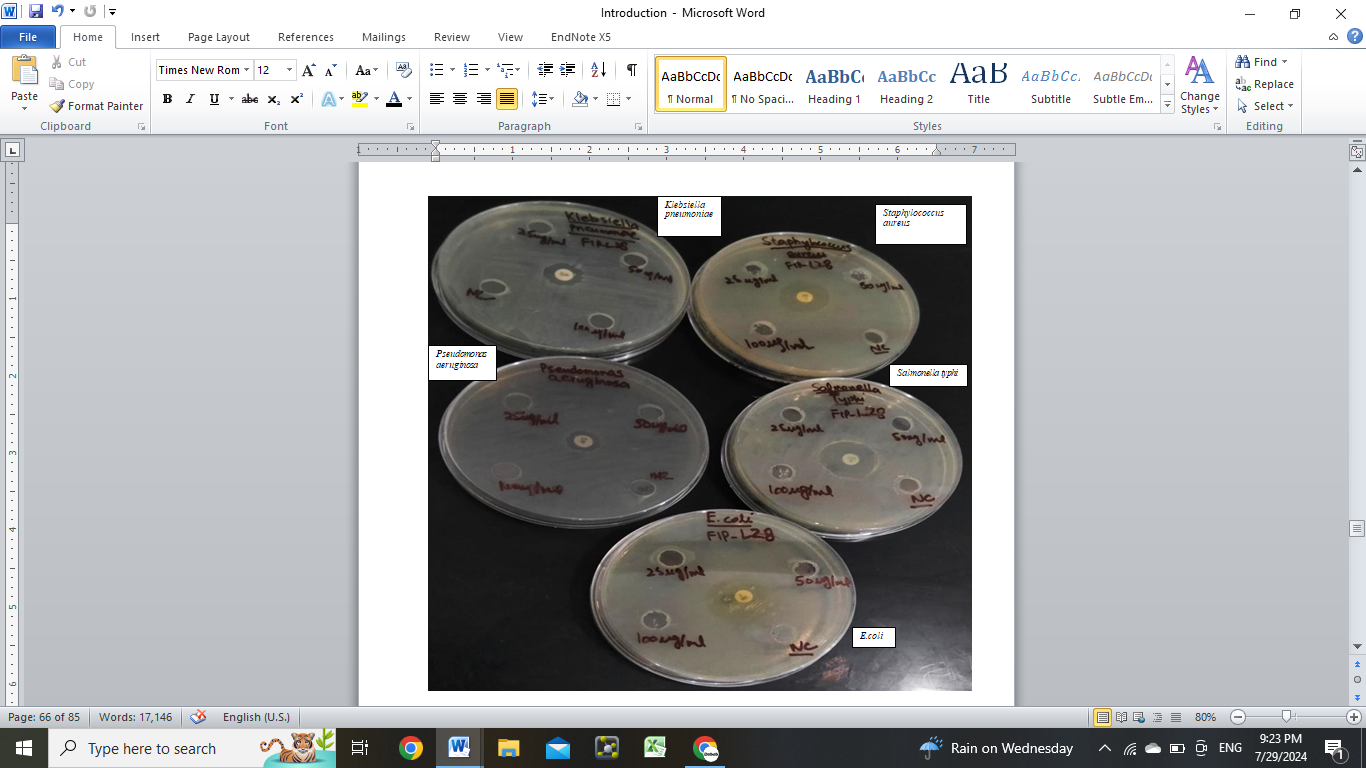
**Figure 4: Evaluation of anti-bacterial activity of FIP-LZ8 against *E. coli, Staphylococcus aureus, Salmonella typhi, Pseudomonas aeruginosa and Klebsiella pneumoniae* by agar well diffusion assay along with positive and negative control*.***

**
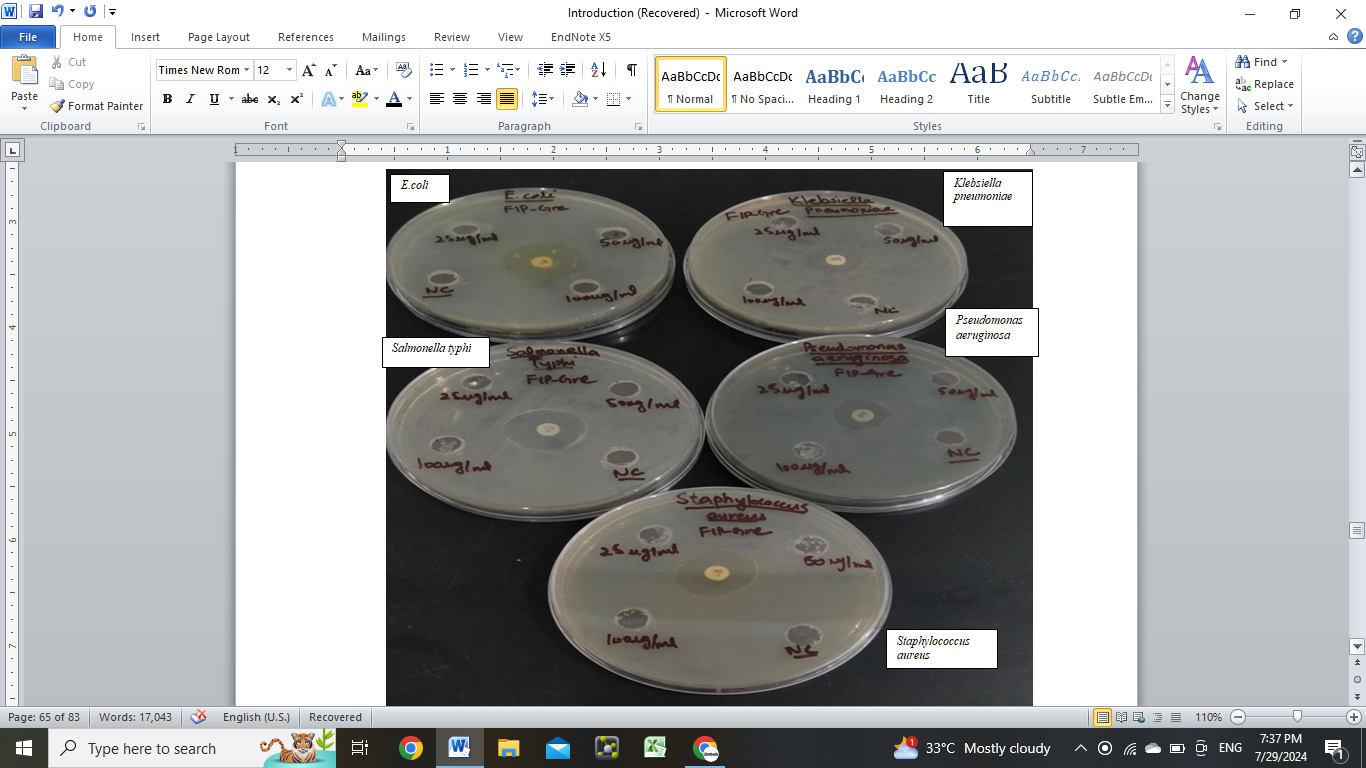
**


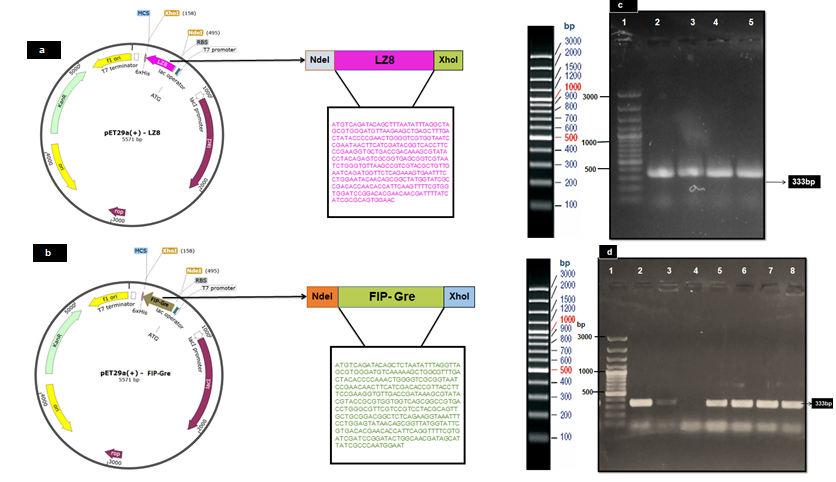
**Figure 5: Evaluation of anti-bacterial activity of FIP-Gre against E. coli, Staphylococcus aureus, Salmonella typhi, Pseudomonas aeruginosa and Klebsiella pneumoniae by agar well diffusion assay along with positive and negative control.**


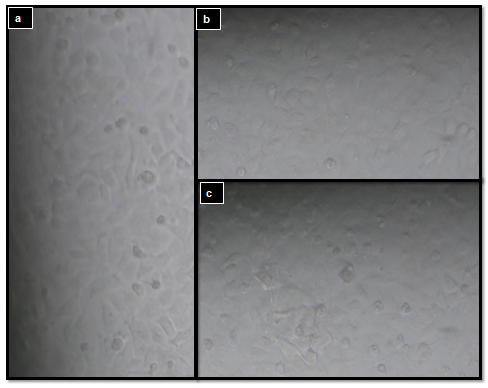
**Figure 6. Construction and confirmation of recombinant plasmids. (a) schematic map of pET-29a(+)-FIP-Glu (LZ8) (b) schematic map of pET-29a(+)-FIP-Gre under the T7 promoter with His₆ tag (c) Electrophoresis of colony PCR products on agarose gel (1%). Lane 1; DNA ladder (100 kb plus, Thermo), lane 2-5, FIP-LZ8 (333 bp). (d) Electrophoresis of colony PCR products on agarose gel (1%). Lane 1; DNA ladder (100 kb plus, Thermo), lane 2-8, FIP-Gre (333 bp) and lane 4: negative control, only contains PCR reagents.**

**Figure 7: Morphological analysis of A549 cells followed by treatment of FIPs. (a) Morphology of control group treated with PBS. (b) Morphology changes in A549 cells on treatment of 8μg/mL of LZ8. (c) Morphology changes in A549 cells on treatment of 8μg/ml of FIP-Gre**

**
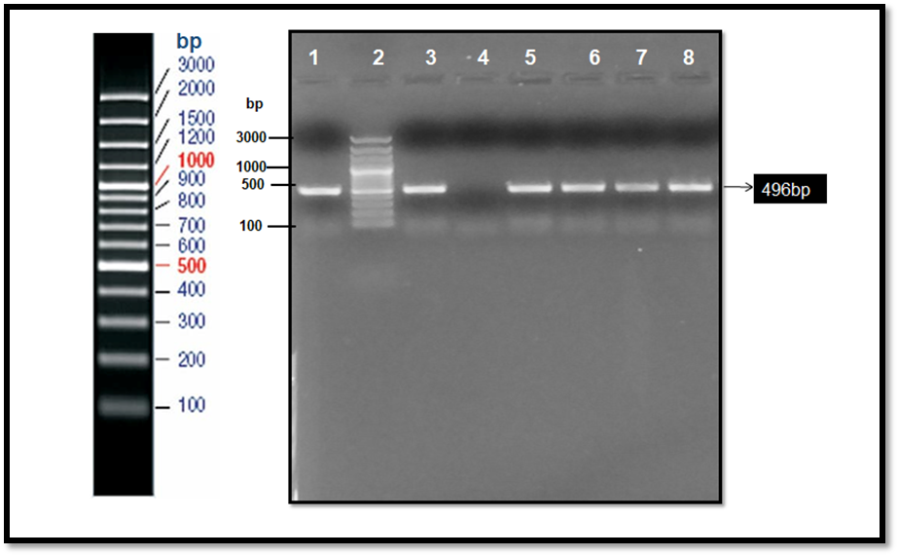
Figure 8: PCR amplification of GAPDH gene. 100kb plus ladder (thermo) (lane 2), GAPDH positive control (lane 3), PCR negative control (lane 4) and lane 1,5-8 show amplification of GAPDH using control and treated group cDNA (496bp).**
